# Supplementary material
Source: HighWire-hosted journal article supplement (https://erj.ersjournals.com/content/55/1/1900964)
Supplement: inline-supplementary-material-1 [file inline-supplementary-material-1.pdf]

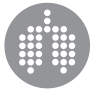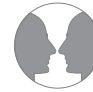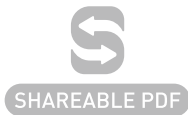

# Tiotropium add-on therapy reduces seasonal peaks of asthma worsening in adults with symptomatic severe asthma

J. Mark FitzGerald<sup>1</sup>, Roland Buhl<sup>2</sup>, Thomas B. Casale<sup>3</sup>, Branko Jugovic<sup>4</sup>, Liliana Zaremba-Pechmann<sup>5</sup> and David M.G. Halpin<sup>6</sup>

**Affiliations:** <sup>1</sup>Centre for Heart and Lung Health, Vancouver, BC, Canada. <sup>2</sup>Dept of Pulmonology, Johannes Gutenberg University Mainz, Mainz, Germany. <sup>3</sup>Division of Allergy and Immunology, University of South Florida Morsani College of Medicine, Tampa, FL, USA. <sup>4</sup>TA CardioMetabolism Respiratory Med, Boehringer Ingelheim International GmbH, Ingelheim am Rhein, Germany. <sup>5</sup>Elderbrook Solutions GmbH, Bietigheim-Bissingen, Germany. <sup>6</sup>Royal Devon and Exeter Hospital, Exeter, UK.

**Correspondence:** J. Mark FitzGerald, Institute for Heart and Lung Health, 7th Floor, 2775 Laurel Street, Vancouver, V5Z 1M9, Canada. E-mail: Mark.Fitzgerald@vch.ca

 @ERSpublications

**In adults with symptomatic severe asthma despite inhaled corticosteroid/long-acting  $\beta_2$ -agonist therapy, tiotropium add-on therapy reduces seasonal peaks of asthma worsening, providing a year-round benefit** <http://bit.ly/2m4LGuH>

**Cite this article as:** FitzGerald JM, Buhl R, Casale TB, *et al.* Tiotropium add-on therapy reduces seasonal peaks of asthma worsening in adults with symptomatic severe asthma. *Eur Respir J* 2020; 55: 1900964 [<https://doi.org/10.1183/13993003.00964-2019>].

This single-page version can be shared freely online.

## *To the Editor:*

Despite the use of preferred controller therapies (including inhaled corticosteroids (ICS) with or without additional long-acting  $\beta_2$ -agonists (LABAs)), a large proportion of patients with asthma have poor disease control, leaving them at risk of recurring symptoms and episodes of asthma exacerbations and worsening [1, 2]. Such problems can be triggered by many different environmental factors including pollutants, respiratory infections or allergens [3]. They may occur sporadically, but are often determined by the seasons, mirroring seasonal patterns of allergen exposure and prevalence of respiratory viral infection [3, 4]. They can cause reduced quality of life, increase asthma burden [2, 3], and have economic and societal impacts, such as increased absenteeism in school-age children, reduced work productivity and missed workdays in adults [5]. It is therefore important to choose an appropriate asthma treatment to achieve good symptom control and minimise the risk of exacerbations and worsening [2].
